# Supplementary material for: Five water-soluble zwitterionic copper(ii)-carboxylate polymers: role of dipyridyl coligands in enhancing the DNA-binding, cleaving and anticancer activities
Source: Royal Society of Chemistry journal article supplement (doi:10.1039/c5dt01648g), 2015-01-01
Supplement: c5dt01648g1.pdf [file c5dt01648g1.pdf]

## Supporting Information

# Five Water-Soluble Zwitterionic Copper(II)-Carboxylate Polymers: Role of Dipyridyl Coligands in Enhancing the DNA-Binding, Cleaving and Anticancer Activities

Ming Chen, Xiao-Yan Tang, Shui-Ping Yang, Huan-HuanLi, Hai-Qing Zhao, Zhi-Hong Jiang, Jin-Xiang Chen,\* Wen-Hua Chen\*

Figure Legends:

**Table S1.** Selected bond distances (Å) and angles (°) for complexes **1-5**.

**Fig. S1.** The double layered structure linked by secondary bond of Cu···O in  $\{[\text{Cu}_3(\text{Cm}(\text{dcp})_2(\text{HO})_2(\text{H}_2\text{O})_2)] \cdot \text{H}_2\text{O}\}_n$  (**1**).

**Fig. S2.** The infinite two-dimensional structure in **3** looking along the *c* axis and all the hydrogen atoms and bipy molecules are omitted for clarity.

**Fig. S3.** The effect of the addition of complex **1** on the emission intensity of the CT DNA-bound ethidium bromide (3.03 μM) at different complex concentrations in a 5 mM Tri-HCl-50 mM NaCl buffer at pH 7.0 and at room temperature.

**Fig. S4.** The effect of the addition of complex **2** on the emission intensity of the CT DNA-bound ethidium bromide (3.03 μM) at different complex concentrations in a 5 mM Tri-HCl-50 mM NaCl buffer at pH 7.0 and at room temperature.

**Fig. S5.** The effect of the addition of complex **3** on the emission intensity of the CT DNA-bound ethidium bromide (3.03 μM) at different complex concentrations in a 5 mM Tri-HCl-50 mM NaCl buffer at pH 7.0 and at room temperature.

**Fig. S6.** The effect of the addition of complex **4** on the emission intensity of the CT DNA-bound ethidium bromide (3.03 μM) at different complex concentrations in a 5 mM Tri-HCl-50 mM NaCl buffer at pH 7.0 and at room temperature.

**Fig. S7.** The effect of the addition of complex **5** on the emission intensity of the CT DNA-bound

ethidium bromide (3.03  $\mu\text{M}$ ) at different complex concentrations in a 5 mM Tris-HCl-50 mM NaCl buffer at pH 7.0 and at room temperature.

**Fig. S8.** Fluorescence decrease of EB induced by the competitive binding of complex **1** to CT-DNA in 5 mM Tris-HCl/NaCl buffer (pH 7.0) at room temperature ( $\lambda_{\text{ex}} = 510 \text{ nm}$ ,  $\lambda_{\text{em}} = 588 \text{ nm}$ ).

**Fig. S9.** Fluorescence decrease of EB induced by the competitive binding of complex **2** to CT-DNA in 5 mM Tris-HCl/NaCl buffer (pH 7.0) at room temperature ( $\lambda_{\text{ex}} = 510 \text{ nm}$ ,  $\lambda_{\text{em}} = 588 \text{ nm}$ ).

**Fig. S10.** Fluorescence decrease of EB induced by the competitive binding of complex **3** to CT-DNA in 5 mM Tris-HCl/NaCl buffer (pH 7.0) at room temperature ( $\lambda_{\text{ex}} = 510 \text{ nm}$ ,  $\lambda_{\text{em}} = 588 \text{ nm}$ ).

**Fig. S11.** Fluorescence decrease of EB induced by the competitive binding of complex **4** to CT-DNA in 5 mM Tris-HCl/NaCl buffer (pH 7.0) at room temperature ( $\lambda_{\text{ex}} = 510 \text{ nm}$ ,  $\lambda_{\text{em}} = 588 \text{ nm}$ ).

**Fig. S12.** Fluorescence decrease of EB induced by the competitive binding of complex **5** to CT-DNA in 5 mM Tris-HCl/NaCl buffer (pH 7.0) at room temperature ( $\lambda_{\text{ex}} = 510 \text{ nm}$ ,  $\lambda_{\text{em}} = 588 \text{ nm}$ ).

**Fig. S13.** Time course of pBR322 DNA cleavage promoted by complex **2** (0.25 mM) at 37 °C and pH 7.00. Inset: agarose GE patterns of the time-variable reaction products. Lanes 1-7, reaction time were 0, 1, 2.5, 4, 5, 6 and 7h, respectively.

**Fig. S14.** Time course of pBR322 DNA cleavage promoted by complex **2** (0.5 mM) at 37 °C and pH 7.00. Inset: agarose GE patterns of the time-variable reaction products. Lanes 1-7, reaction time were 0, 1, 2, 3, 4, 5 and 6 h, respectively.

**Fig. S15.** Time course of pBR322 DNA cleavage promoted by complex **2** (0.75 mM) at 37 °C and pH 7.00. Inset: agarose GE patterns of the time-variable reaction products. Lanes 1-7, reaction time were 0, 1, 2, 3, 4, 5 and 6 h, respectively.

**Fig. S16.** Time course of pBR322 DNA cleavage promoted by complex **2** (1.0 mM) at 37 °C and pH 7.00. Inset: agarose GE patterns of the time-variable reaction products. Lanes 1-7, reaction time were 0, 1, 2, 3, 4, 5 and 6 h, respectively.

**Fig. S17.** Time course of pBR322 DNA cleavage promoted by complex **2** (1.25 mM) at 37 °C and pH 7.00. Inset: agarose GE patterns of the time-variable reaction products. Lanes 1-7, reaction time were 0, 0.5, 1, 2, 3, 4 and 5 h, respectively.

**Fig. S18.** Time course of pBR322 DNA cleavage promoted by complex **2** (1.5 mM) at 37 °C and pH 7.00. Inset: agarose GE patterns of the time-variable reaction products. Lanes 1-7, reaction time were 0, 1, 1.5, 2, 2.5, 3 and 4 h, respectively.

**Fig. S19.** Time course of pBR322 DNA cleavage promoted by complex **2** (1.75 mM) at 37 °C and pH 7.00. Inset: agarose GE patterns of the time-variable reaction products. Lanes 1-7, reaction time were 0, 1, 1.5, 2, 2.5, 3 and 4 h, respectively.

**Fig. S20.** Time course of pBR322 DNA cleavage promoted by complex **3** (12.5 μM) at 37°C and pH 7.00. Inset: agarose GE patterns of the time-variable reaction products. Lanes 1-7, reaction time were 0, 1, 2.5, 4, 5.5, 7 and 8 h, respectively.

**Fig. S21.** Time course of pBR322 DNA cleavage promoted by complex **3** (25 μM) at 37°C and pH 7.00. Inset: agarose GE patterns of the time-variable reaction products. Lanes 1-7, reaction time were 0, 1, 2.5, 4, 5, 6 and 7 h, respectively.

**Fig. S22.** Time course of pBR322 DNA cleavage promoted by complex **3** (37.5 μM) at 37°C and pH 7.00. Inset: agarose GE patterns of the time-variable reaction products. Lanes 1-7, reaction time were 0, 1, 2.5, 4, 5, 6 and 7 h, respectively.

**Fig. S23.** Time course of pBR322 DNA cleavage promoted by complex **3** (50 μM) at 37°C and pH 7.00. Inset: agarose GE patterns of the time-variable reaction products. Lanes 1-7, reaction time were 0, 1, 2, 3, 4, 5 and 6 h, respectively.

**Fig. S24.** Time course of pBR322 DNA cleavage promoted by complex **3** (62.5 μM) at 37°C and pH 7.00. Inset: agarose GE patterns of the time-variable reaction products. Lanes 1-7, reaction time were 0, 0.5, 1, 2, 3, 4 and 5 h, respectively.

**Fig. S25.** Time course of pBR322 DNA cleavage promoted by complex **3** (75 μM) at 37°C and pH 7.00. Inset: agarose GE patterns of the time-variable reaction products. Lanes 1-7, reaction time were 0, 0.5, 1, 2, 3, 4 and 5 h, respectively.

**Fig. S26.** Time course of pBR322 DNA cleavage promoted by complex **3** (87.5 μM) at 37°C and pH 7.00. Inset: agarose GE patterns of the time-variable reaction products. Lanes 1-7, reaction time were 0, 0.5, 1, 2, 2.5, 3 and 4 h, respectively.

**Fig. S27.** Time course of pBR322 DNA cleavage promoted by complex **5** (12.5 μM) at 37°C and pH 7.00. Inset: agarose GE patterns of the time-variable reaction products. Lanes 1-7, reaction time were 0, 1, 2.5, 4, 5.5, 7 and 8 h, respectively.

**Fig. S28.** Time course of pBR322 DNA cleavage promoted by complex **5** (25 μM) at 37°C and pH 7.00. Inset: agarose GE patterns of the time-variable reaction products. Lanes 1-7, reaction time were 0, 1, 2.5, 4, 5, 6 and 7 h, respectively.

**Fig. S29.** Time course of pBR322 DNA cleavage promoted by complex **5** (37.5  $\mu$ M) at 37°C and pH 7.00. Inset: agarose GE patterns of the time-variable reaction products. Lanes 1-7, reaction time were 0, 1, 2.5, 4, 5, 6 and 7 h, respectively.

**Fig. S30.** Time course of pBR322 DNA cleavage promoted by complex **5** (50  $\mu$ M) at 37°C and pH 7.00. Inset: agarose GE patterns of the time-variable reaction products. Lanes 1-7, reaction time were 0, 1, 2, 3, 4, 5 and 6 h, respectively.

**Fig. S31.** Time course of pBR322 DNA cleavage promoted by complex **5** (62.5  $\mu$ M) at 37°C and pH 7.00. Inset: agarose GE patterns of the time-variable reaction products. Lanes 1-7, reaction time were 0, 0.5, 1, 2, 3, 4 and 5 h, respectively.

**Fig. S32.** Time course of pBR322 DNA cleavage promoted by complex **5** (75  $\mu$ M) at 37°C and pH 7.00. Inset: agarose GE patterns of the time-variable reaction products. Lanes 1-7, reaction time were 0, 0.5, 1, 2, 3, 4 and 5 h, respectively.

**Fig. S33.** Time course of pBR322 DNA cleavage promoted by complex **5** (87.5  $\mu$ M) at 37°C and pH 7.00. Inset: agarose GE patterns of the time-variable reaction products. Lanes 1-7, reaction time were 0, 0.5, 1, 2, 2.5, 3 and 4 h, respectively.

**Fig. S34.** Agarose GE patterns for the cleavage of pBR322 DNA by complex **2** (1.75 mM) at pH 7.0 and 37 °C for 5 h, in the presence of DMSO (1 M, Lane 3), MeOH (1 M, Lane 4), KI (0.1 M, Lane 5), NaN<sub>3</sub> (0.1 M, Lane 6) and EDTA (0.1 M, Lane 7). Lane 1, DNA alone and Lane 2: DNA + complex **2**.

**Fig. S35.** Agarose GE patterns for the cleavage of pBR322 DNA by complex **3** (62.5  $\mu$ M) at pH 7.0 and 37 °C for 5 h, in the presence of DMSO (1 M, Lane 3), MeOH (1 M, Lane 4), KI (0.1 M, Lane 5), NaN<sub>3</sub> (0.1 M, Lane 6) and EDTA (0.1 M, Lane 7). Lane 1, DNA alone and Lane 2: DNA + complex **3**.

**Table S1.** Selected bond distances (Å) and angles (°) for complexes **1-5**.

| Complex  | Bond        | Distance (Å) | Bond               | Angles (°) |
|----------|-------------|--------------|--------------------|------------|
| <b>1</b> | Cu(1)-O(13) | 1.8615(18)   | O(13)-Cu(1)-O(5)#1 | 197.54(7)  |
|          | Cu(1)-O(2)  | 1.9237(17)   | O(13)-Cu(1)-O(5)#1 | 97.54(7)   |
|          | Cu(2)-O(14) | 1.8667(18)   | O(5)#1-Cu(1)-O(2)  | 166.60(7)  |
|          | Cu(2)-O(7)  | 1.9653(18)   | O(5)#1-Cu(1)-O(1W) | 82.72(8)   |
|          | Cu(3)-O(14) | 1.8484(18)   | O(14)-Cu(2)-O(13)  | 173.16(10) |

|          |               |            |                     |            |
|----------|---------------|------------|---------------------|------------|
|          | Cu(3)-O(8)    | 1.9366(16) | O(13)-Cu(2)-O(7)    | 83.45(8)   |
|          | O(5)-Cu(1)#2  | 1.9101(17) | O(13)-Cu(2)-O(1)    | 94.46(7)   |
|          | Cu(1)-O(5)#1  | 1.9101(17) | O(14)-Cu(3)-O(11)#2 | 95.81(8)   |
|          | Cu(1)-O(1W)   | 1.949(2)   | O(11)#2-Cu(3)-O(8)  | 169.14(8)  |
|          | Cu(2)-O(13)   | 1.8786(18) | O(11)#2-Cu(3)-O(2W) | 86.42(8)   |
|          | Cu(2)-O(1)    | 1.9874(15) | O(13)-Cu(1)-O(2)    | 95.82(8)   |
|          | Cu(3)-O(11)#2 | 1.9291(17) | O(13)-Cu(1)-O(1W)   | 168.16(13) |
|          | Cu(3)-O(2W)   | 1.9441(19) | O(2)-Cu(1)-O(1W)    | 83.98(8)   |
|          | O(11)-Cu(3)#1 | 1.9291(17) | O(14)-Cu(2)-O(7)    | 95.82(8)   |
|          |               |            | O(14)-Cu(2)-O(1)    | 85.90(7)   |
|          |               |            | O(7)-Cu(2)-O(1)     | 176.34(8)  |
|          |               |            | O(14)-Cu(3)-O(8)    | 94.12(8)   |
|          |               |            | O(14)-Cu(3)-O(2W)   | 175.74(9)  |
|          |               |            | O(8)-Cu(3)-O(2W)    | 83.40(8)   |
| <b>2</b> | Cu(1)-O(1)    | 1.937(3)   | O(1)-Cu(1)-O(1W)    | 177.90(15) |
|          | Cu(1)-O(5)#3  | 1.967(3)   | O(1)-Cu(1)-O(5)#3   | 90.98(14)  |
|          | Cu(1)-O(2)#4  | 2.425(3)   | O(1W)-Cu(1)-O(5)#3  | 91.05(14)  |
|          | O(2)-Cu(1)#5  | 2.425(3)   | O(1)-Cu(1)-O(2W)    | 87.32(14)  |
|          | Cu(1)-O(1W)   | 1.944(4)   | O(1W)-Cu(1)-O(2W)   | 90.63(14)  |
|          | Cu(1)-O(2W)   | 1.970(3)   | O(5)#3-Cu(1)-O(2W)  | 176.93(14) |
|          | Cu(1)-H(1W1)  | 1.86(6)    | O(1)-Cu(1)-O(2)#4   | 85.48(13)  |
|          | O(5)-Cu(1)#6  | 1.967(3)   | O(1W)-Cu(1)-O(2)#4  | 95.10(15)  |
|          |               |            | O(5)#3-Cu(1)-O(2)#4 | 88.56(12)  |
|          |               |            | O(2W)-Cu(1)-O(2)#4  | 93.86(13)  |
| <b>3</b> | Cu(1)-O(4)#7  | 1.9452(13) | O(4)#7-Cu(1)-O(2)   | 95.77(5)   |
|          | Cu(1)-N(2)    | 2.0042(14) | O(2)-Cu(1)-N(2)     | 172.05(6)  |
|          | Cu(1)-O(6)#8  | 2.4353(15) | O(2)-Cu(1)-N(1)     | 93.30(6)   |
|          | O(6)-Cu(1)#10 | 2.4353(15) | O(4)#7-Cu(1)-O(6)#8 | 85.88(6)   |
|          | Cu(1)-O(2)    | 1.9451(12) | N(2)-Cu(1)-O(6)#8   | 100.88(5)  |
|          | Cu(1)-N(1)    | 2.0112(15) | O(4)#7-Cu(1)-N(2)   | 89.72(6)   |
|          | O(4)-Cu(1)#9  | 1.9452(13) | O(4)#7-Cu(1)-N(1)   | 169.29(6)  |
|          |               |            | N(2)-Cu(1)-N(1)     | 80.70(6)   |
|          |               |            | O(2)-Cu(1)-O(6)#8   | 85.28(5)   |
|          |               |            | N(1)-Cu(1)-O(6)#8   | 100.56(5)  |

**Table S1. Continued**

| Complex  | Bond          | Distance (Å) | Bond                | Angles (°) |
|----------|---------------|--------------|---------------------|------------|
| <b>4</b> | Cu(1)-O(1)    | 1.9315(19)   | O(1)-Cu(1)-O(1W)    | 177.15(8)  |
|          | Cu(1)-O(6)#11 | 1.9851(19)   | O(1W)-Cu(1)-O(6)#11 | 92.15(9)   |
|          | Cu(1)-O(5)#12 | 2.293(2)     | O(1W)-Cu(1)-O(2W)   | 92.08(8)   |
|          | O(6)-Cu(1)#13 | 1.9851(19)   | O(5)#11-Cu(1)-O(1W) | 82.72(8)   |
|          | Cu(1)-O(1W)   | 1.936(2)     | O(1)-Cu(1)-O(5)#12  | 92.39(8)   |

|          |               |            |                     |            |
|----------|---------------|------------|---------------------|------------|
|          | Cu(1)-O(2W)   | 1.9893(19) | O(1)-Cu(1)-O(5)#12  | 11.98(8)   |
|          | O(5)-Cu(1)#12 | 2.293(2)   | O(1)-Cu(1)-O(6)#11  | 90.62(8)   |
|          |               |            | O(1)-Cu(1)-O(2W)    | 85.14(8)   |
|          |               |            | O(6)#11-Cu(1)-O(2W) | 151.62(9)  |
|          |               |            | O(1W)-Cu(1)-O(5)#12 | 87.21(9)   |
|          |               |            | O(2W)-Cu(1)-O(5)#12 | 96.24(8)   |
| <hr/>    |               |            |                     |            |
| <b>5</b> | Cu(1)-O(5)#14 | 1.944(4)   | O(5)#14-Cu(1)-O(1)  | 94.31(17)  |
|          | Cu(1)-N(1)    | 2.020(5)   | O(1)-Cu(1)-N(1)     | 164.42(19) |
|          | Cu(1)-O(1W)   | 2.271(4)   | O(1)-Cu(1)-N(2)     | 96.72(18)  |
|          | Cu(1)-O(1)    | 1.975(4)   | O(5)#14-Cu(1)-O(1W) | 84.42(18)  |
|          | Cu(1)-N(2)    | 2.027(5)   | N(1)-Cu(1)-O(1W)    | 108.30(19) |
|          | O(5)-Cu(1)#15 | 1.944(4)   | O(5)#14-Cu(1)-N(1)  | 96.24(8)   |
|          |               |            | O(5)#14-Cu(1)-N(2)  | 165.32(18) |
|          |               |            | N(1)-Cu(1)-N(2)     | 81.6(2)    |
|          |               |            | O(1)-Cu(1)-O(1W)    | 86.98(17)  |
|          |               |            | N(2)-Cu(1)-O(1W)    | 86.51(18)  |

Symmetry transformations used to generate equivalent atoms: #1:  $x + 1, y + 1, z$ ; #2:  $x - 1, y - 1, z$ ; #3:  $x + 1, y, z$ ; #4:  $-x + 1, y + 1/2, -z + 1/2$ ; #5:  $-x + 1, y - 1/2, -z + 1/2$ ; #6:  $x - 1, y, z$ ; #7:  $x + 1, y, z$ ; #8:  $-x + 1/2, y + 1/2, -z + 3/2$ ; #9:  $x - 1, y, z$ ; #10:  $-x + 1/2, y - 1/2, -z + 3/2$ ; #11:  $x + 1, y - 1, z$ ; #12:  $-x - 2, -y + 2, -z + 1$ ; #13:  $x - 1, y + 1, z$ ; #14:  $x - 1, y, z$ ; #15:  $x + 1, y, z$ .

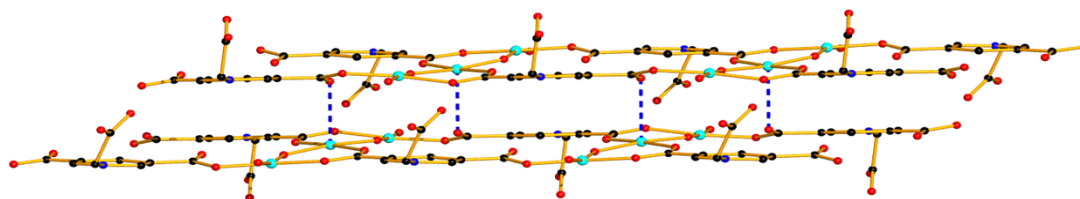

**Fig. S1.** The double layered structure linked by secondary bond of Cu···O in  $\{[\text{Cu}_3(\text{Cm}(\text{dcp})_2(\text{HO})_2(\text{H}_2\text{O})_2)] \cdot \text{H}_2\text{O}\}_n$  (**1**).

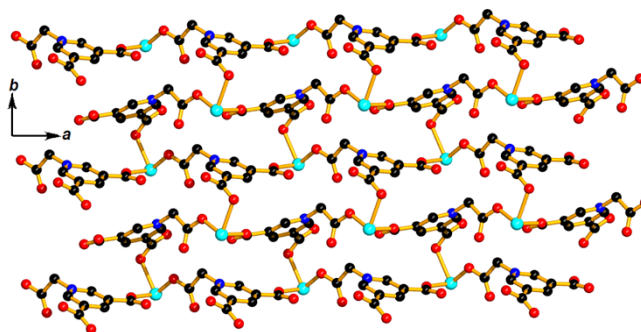

**Fig. S2.** The infinite two-dimensional structure in **3** looking along the *c* axis and all the hydrogen atoms and bipy molecules are omitted for clarity.

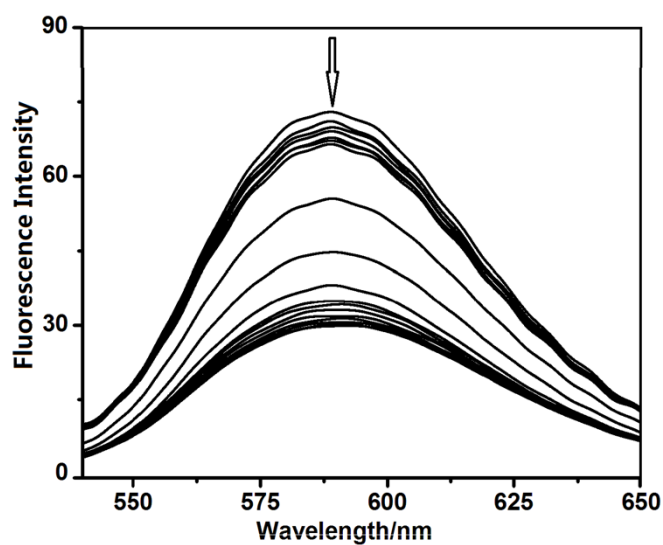

**Fig. S3.** The effect of the addition of complex **1** on the emission intensity of the CT DNA-bound ethidium bromide ( $3.03 \mu\text{M}$ ) at different complex concentrations in a 5 mM Tris-HCl-50 mM NaCl buffer at pH 7.0 and at room temperature.

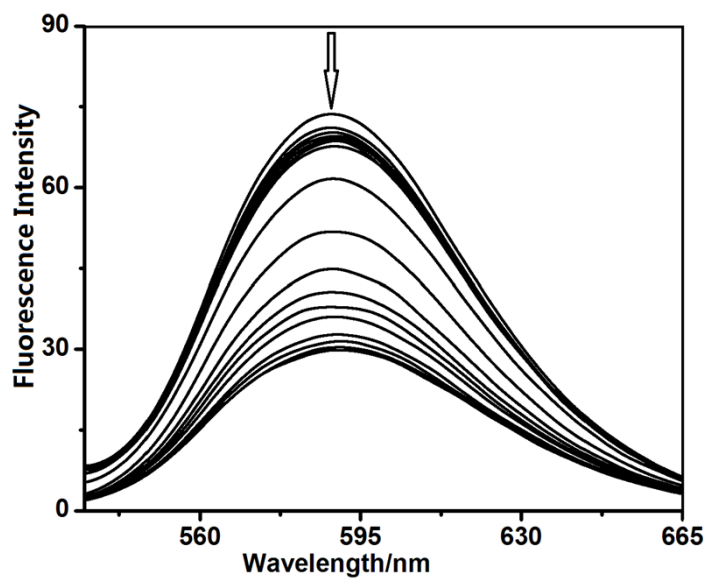

**Fig. S4.** The effect of the addition of complex **2** on the emission intensity of the CT DNA-bound ethidium bromide ( $3.03 \mu\text{M}$ ) at different complex concentrations in a 5 mM Tri-HCl-50 mM NaCl buffer at pH 7.0 and at room temperature.

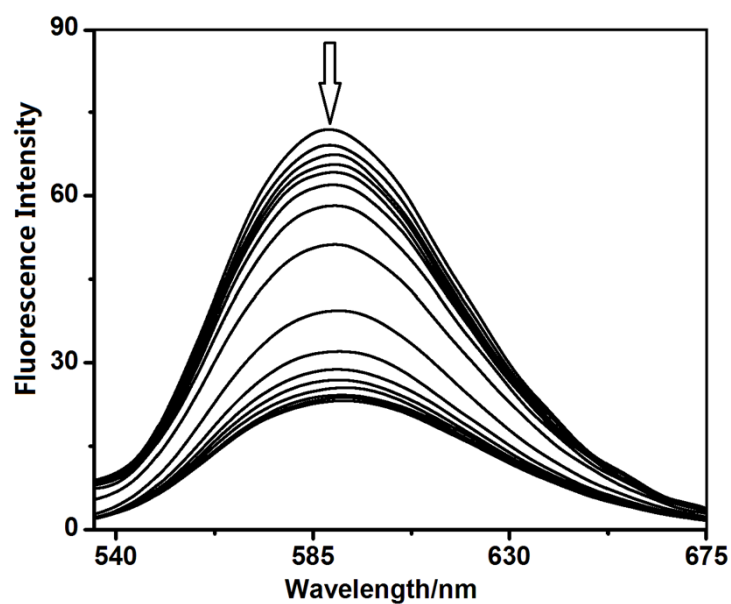

**Fig. S5.** The effect of the addition of complex **3** on the emission intensity of the CT DNA-bound ethidium bromide ( $3.03 \mu\text{M}$ ) at different complex concentrations in a 5 mM Tri-HCl-50 mM NaCl buffer at pH 7.0 and at room temperature.



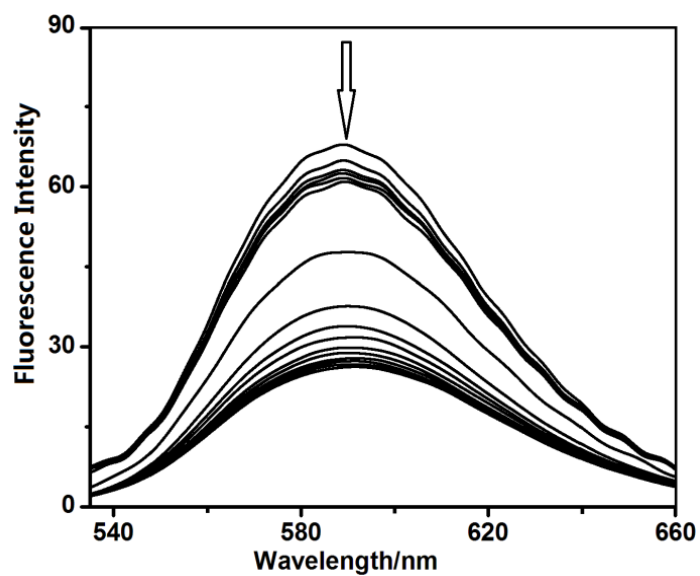

**Fig. S6.** The effect of the addition of complex **4** on the emission intensity of the CT DNA-bound ethidium bromide ( $3.03 \mu\text{M}$ ) at different complex concentrations in a 5 mM Tri-HCl-50 mM NaCl buffer at pH 7.0 and at room temperature.

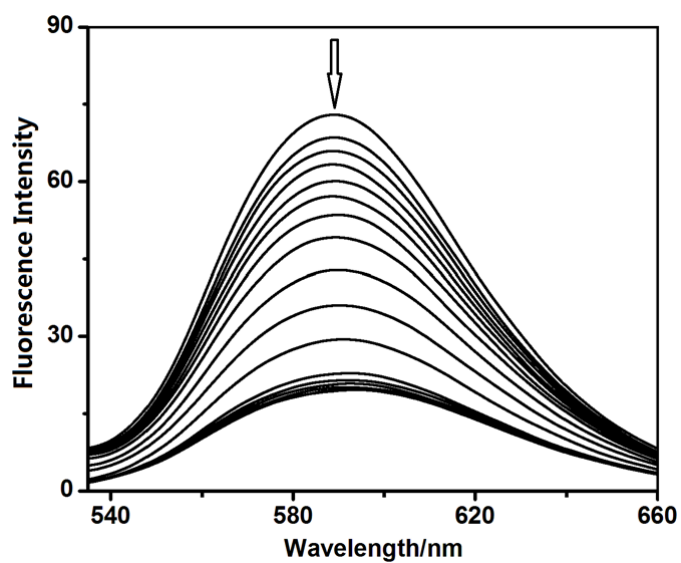

**Fig. S7.** The effect of the addition of complex **5** on the emission intensity of the CT DNA-bound ethidium bromide ( $3.03 \mu\text{M}$ ) at different complex concentrations in a 5 mM Tri-HCl-50 mM NaCl buffer at pH 7.0 and at room temperature.

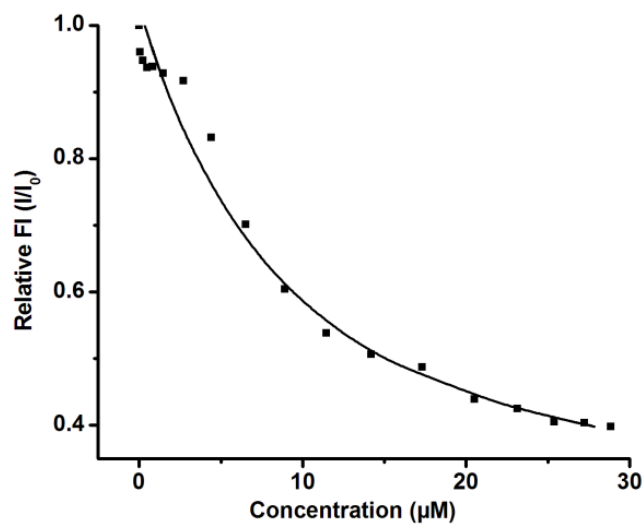

**Fig. S8.** Fluorescence decrease of EB induced by the competitive binding of complex **1** to CT-DNA in 5 mM Tris-HCl/NaCl buffer (pH 7.0) at room temperature ( $\lambda_{\text{ex}} = 510$  nm,  $\lambda_{\text{em}} = 588$  nm).

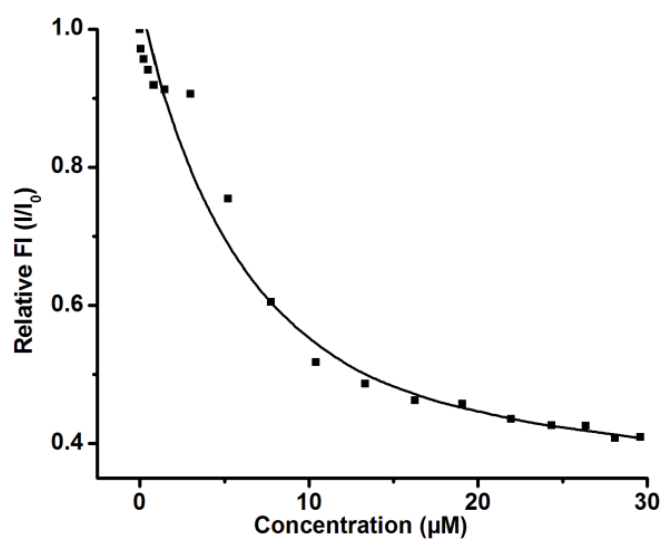

**Fig. S9.** Fluorescence decrease of EB induced by the competitive binding of complex **2** to CT-DNA in 5 mM Tris-HCl/NaCl buffer (pH 7.0) at room temperature ( $\lambda_{\text{ex}} = 510$  nm,  $\lambda_{\text{em}} = 588$  nm).

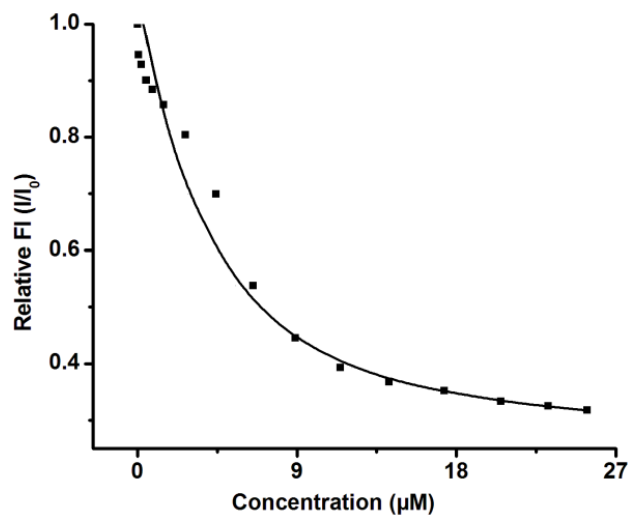

**Fig. S10.** Fluorescence decrease of EB induced by the competitive binding of complex **3** to CT-DNA in 5 mM Tris-HCl/NaCl buffer (pH 7.0) at room temperature ( $\lambda_{\text{ex}} = 510 \text{ nm}$ ,  $\lambda_{\text{em}} = 588 \text{ nm}$ ).

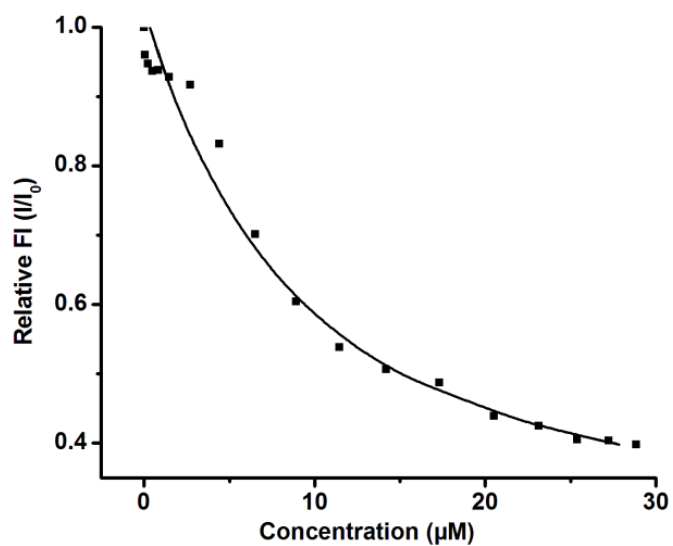

**Fig. S11.** Fluorescence decrease of EB induced by the competitive binding of complex **4** to CT-DNA in 5 mM Tris-HCl/NaCl buffer (pH 7.0) at room temperature ( $\lambda_{\text{ex}} = 510 \text{ nm}$ ,  $\lambda_{\text{em}} = 588 \text{ nm}$ ).

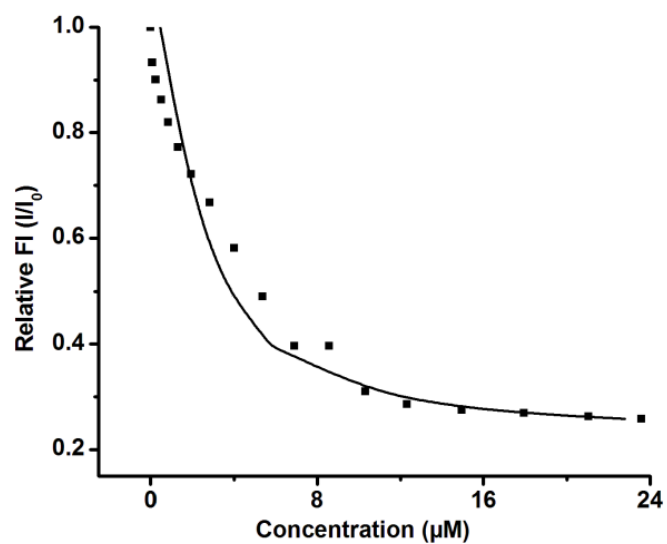

**Fig. S12.** Fluorescence decrease of EB induced by the competitive binding of complex **5** to CT-DNA in 5 mM Tris-HCl/NaCl buffer (pH 7.0) at room temperature ( $\lambda_{\text{ex}} = 510 \text{ nm}$ ,  $\lambda_{\text{em}} = 588 \text{ nm}$ ).

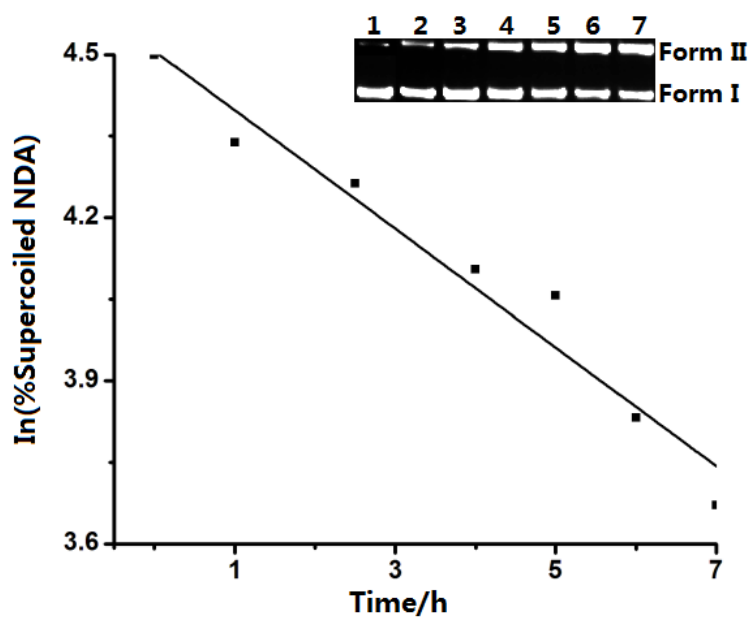

**Fig. S13.** Time course of pBR322 DNA cleavage promoted by complex **2** (0.25 mM) at 37°C and pH 7.00. Inset: agarose GE patterns of the time-variable reaction products. Lanes 1-7, reaction time were 0, 1, 2.5, 4, 5, 6 and 7 h, respectively.

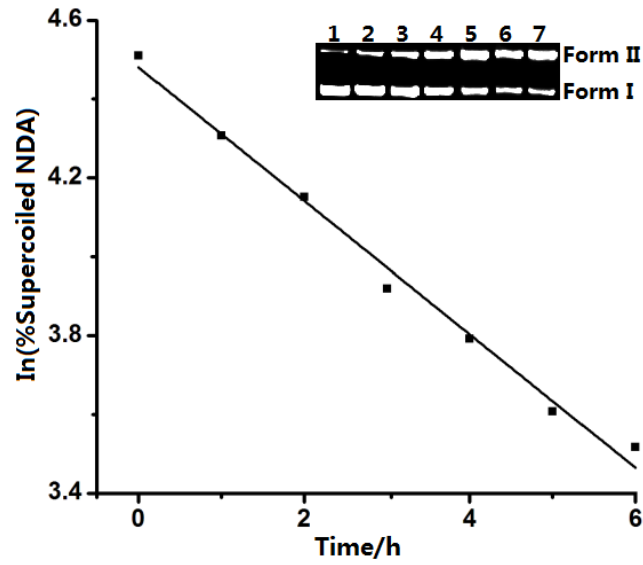

**Fig. S14.** Time course of pBR322 DNA cleavage promoted by complex **2** (0.5 mM) at 37°C and pH 7.00. Inset: agarose GE patterns of the time-variable reaction products. Lanes 1-7, reaction time were 0, 1, 2, 3, 4, 5 and 6 h, respectively.

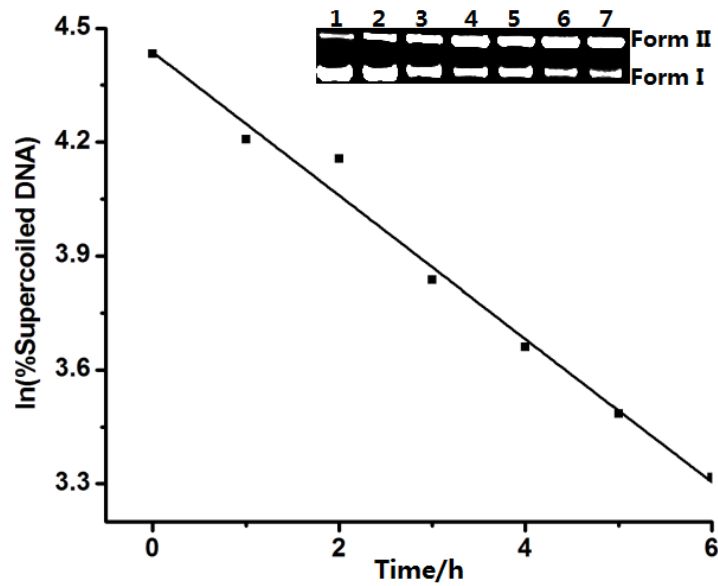

**Fig. S15.** Time course of pBR322 DNA cleavage promoted by complex **2** (0.75 mM) at 37°C and pH 7.00. Inset: agarose GE patterns of the time-variable reaction products. Lanes 1-7, reaction time were 0, 1, 2, 3, 4, 5 and 6 h, respectively.

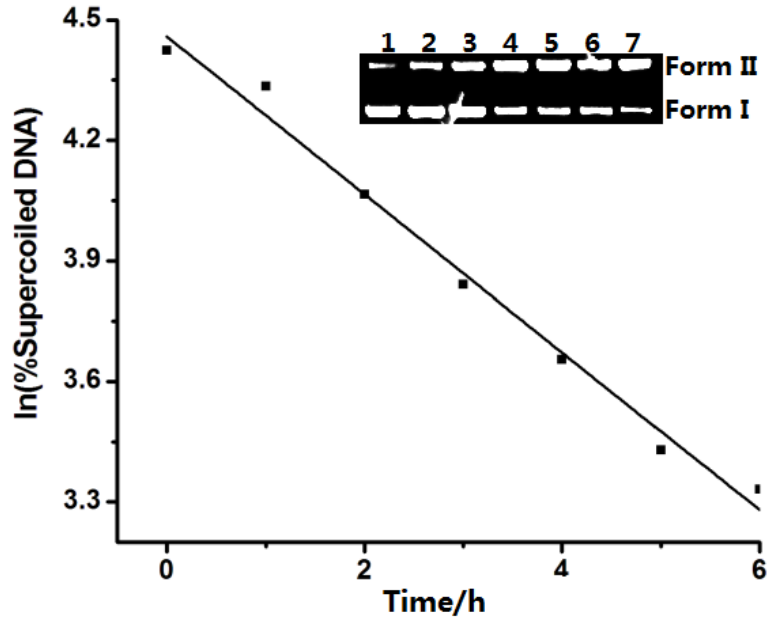

**Fig. S16.** Time course of pBR322 DNA cleavage promoted by complex 2 (1.0 mM) at 37°C and pH 7.00. Inset: agarose GE patterns of the time-variable reaction products. Lanes 1-7, reaction time were 0, 1, 2, 3, 4, 5 and 6 h, respectively.

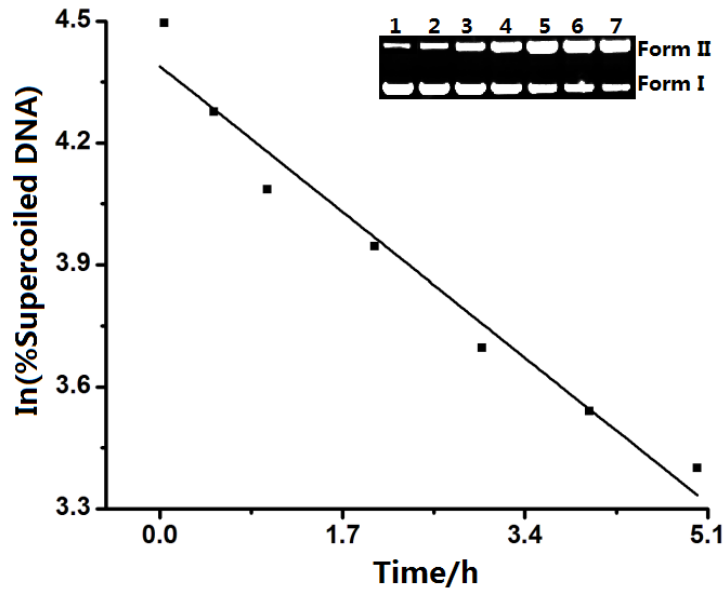

**Fig. S17.** Time course of pBR322 DNA cleavage promoted by complex 2 (1.25 mM) at 37°C and pH 7.00. Inset: agarose GE patterns of the time-variable reaction products. Lanes 1-7, reaction time were 0, 0.5, 1, 2, 3, 4 and 5 h, respectively.

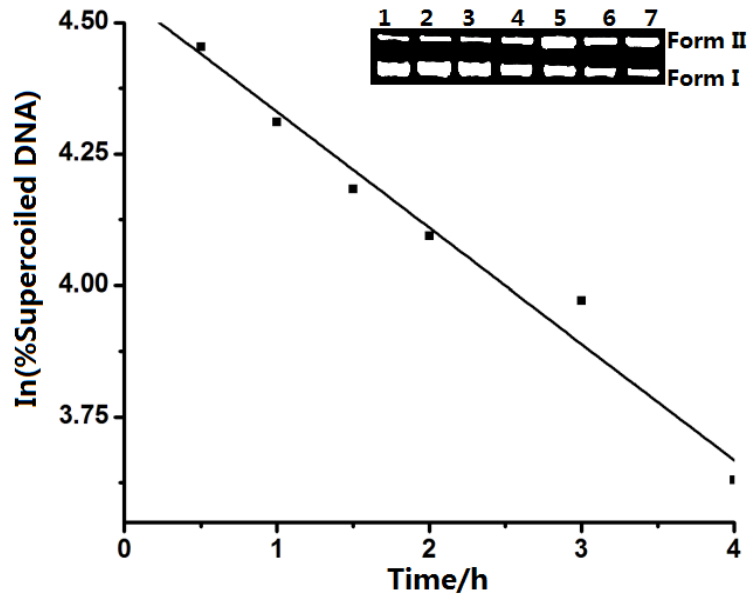

**Fig. S18.** Time course of pBR322 DNA cleavage promoted by complex 2 (1.5 mM) at 37°C and pH 7.00. Inset: agarose GE patterns of the time-variable reaction products. Lanes 1-7, reaction time were 0, 0.5, 1, 1.5, 2, 3 and 4 h, respectively.

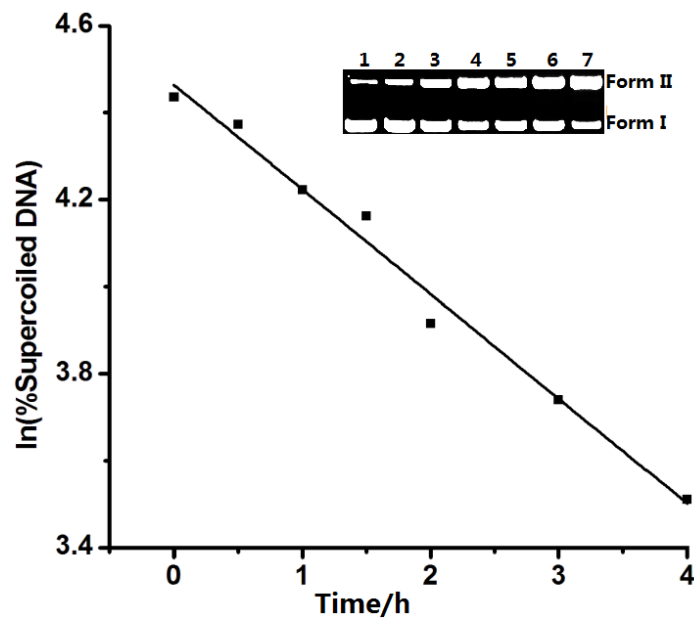

**Fig. S19.** Time course of pBR322 DNA cleavage promoted by complex 2 (1.75 mM) at 37°C and pH 7.00. Inset: agarose GE patterns of the time-variable reaction products. Lanes 1-7, reaction time were 0, 0.5, 1, 1.5, 2, 3 and 4 h, respectively.

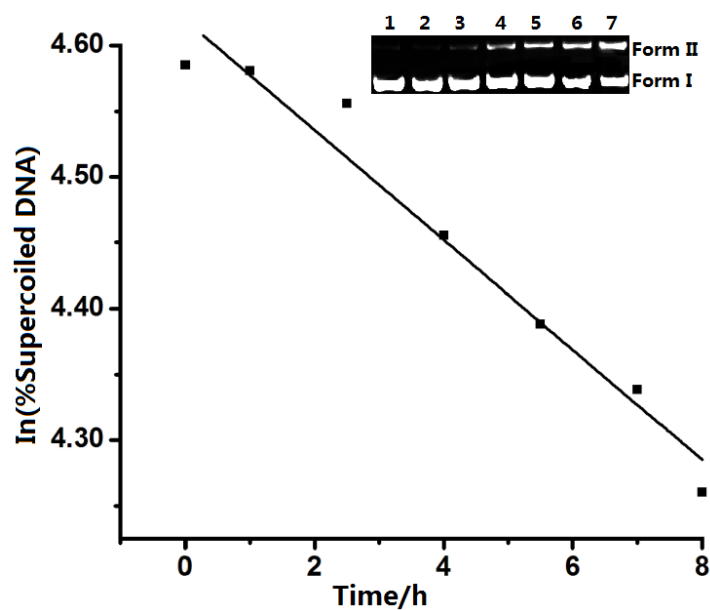

**Fig. S20.** Time course of pBR322 DNA cleavage promoted by complex **3** (12.5  $\mu$ M) at 37°C and pH 7.00. Inset: agarose GE patterns of the time-variable reaction products. Lanes 1-7, reaction time were 0, 1, 2.5, 4, 5.5, 7 and 8 h, respectively.

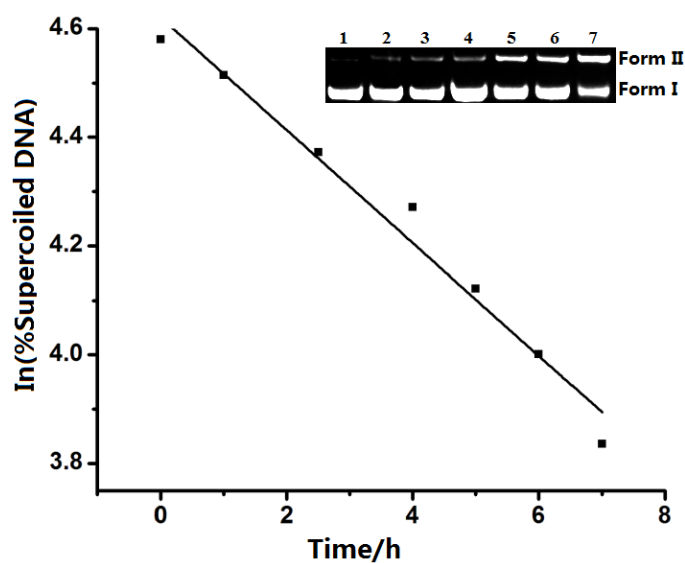

**Fig. S21.** Time course of pBR322 DNA cleavage promoted by complex **3** (25  $\mu$ M) at 37°C and pH 7.00. Inset: agarose GE patterns of the time-variable reaction products. Lanes 1-7, reaction time were 0, 1, 2.5, 4, 5, 6 and 7 h, respectively.



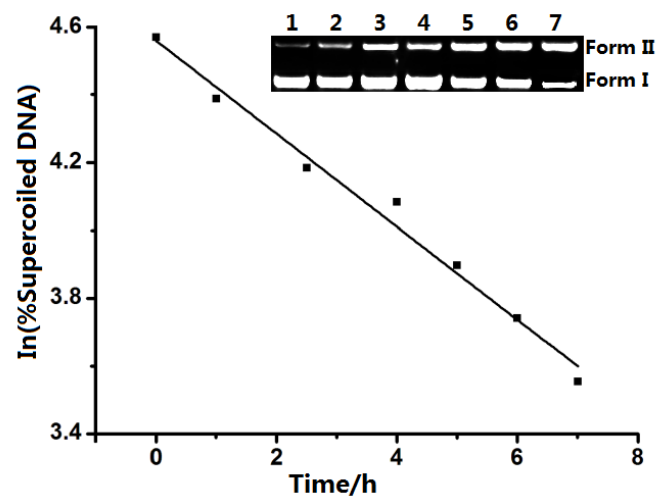

**Fig. S22.** Time course of pBR322 DNA cleavage promoted by complex **3** (37.5  $\mu\text{M}$ ) at 37°C and pH 7.00. Inset: agarose GE patterns of the time-variable reaction products. Lanes 1-7, reaction time were 0, 1, 2.5, 4, 5, 6 and 7 h, respectively.

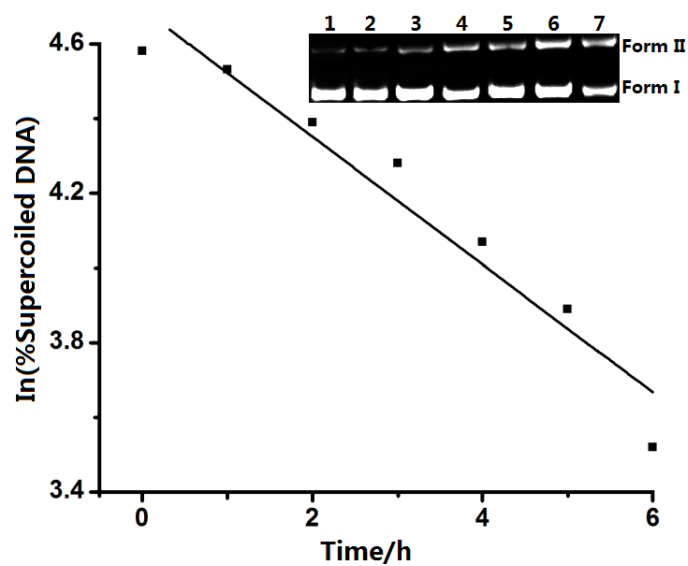

**Fig. S23.** Time course of pBR322 DNA cleavage promoted by complex **3** (50  $\mu\text{M}$ ) at 37°C and pH 7.00. Inset: agarose GE patterns of the time-variable reaction products. Lanes 1-7, reaction time were 0, 1, 2, 3, 4, 5 and 6 h, respectively.

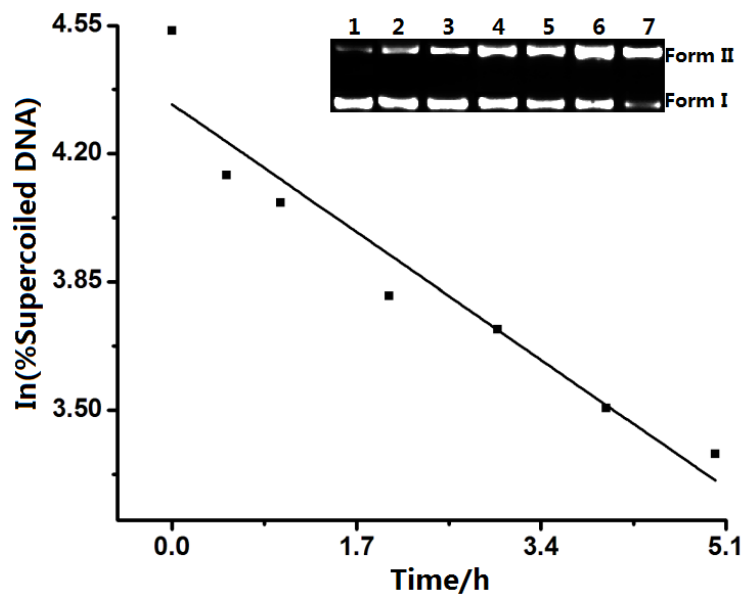

**Fig. S24.** Time course of pBR322 DNA cleavage promoted by complex **3** (62.5  $\mu$ M) at 37°C and pH 7.00. Inset: agarose GE patterns of the time-variable reaction products. Lanes 1-7, reaction time were 0, 0.5, 1, 2, 3, 4 and 5 h, respectively.

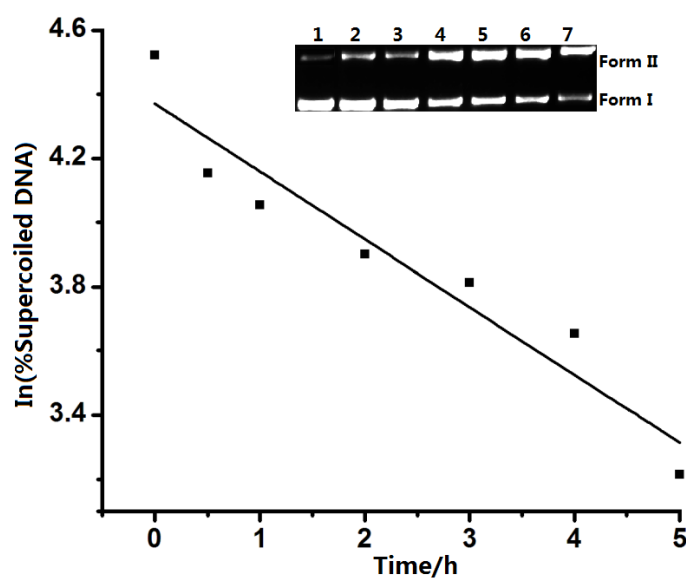

**Fig. S25.** Time course of pBR322 DNA cleavage promoted by complex **3** (75  $\mu$ M) at 37°C and pH 7.00. Inset: agarose GE patterns of the time-variable reaction products. Lanes 1-7, reaction time were 0, 0.5, 1, 2, 3, 4 and 5 h, respectively.

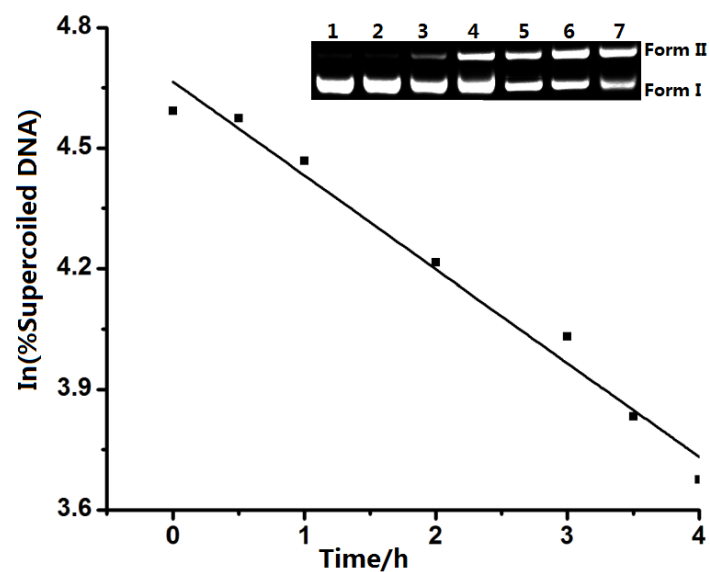

**Fig. S26.** Time course of pBR322 DNA cleavage promoted by complex **3** (87.5  $\mu$ M) at 37°C and pH 7.00. Inset: agarose GE patterns of the time-variable reaction products. Lanes 1-7, reaction time were 0, 0.5, 1, 2, 2.5, 3 and 4 h, respectively.

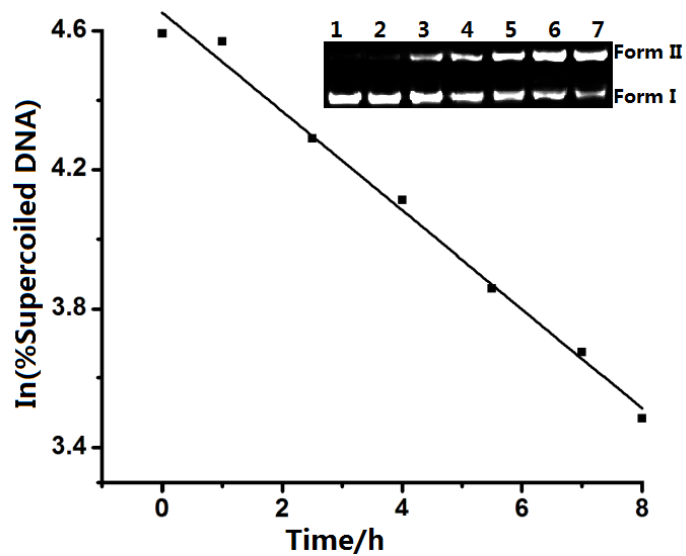

**Fig. S27.** Time course of pBR322 DNA cleavage promoted by complex **5** (12.5  $\mu$ M) at 37°C and pH 7.00. Inset: agarose GE patterns of the time-variable reaction products. Lanes 1-7, reaction time were 0, 1, 2.5, 4, 5.5, 7 and 8 h, respectively.

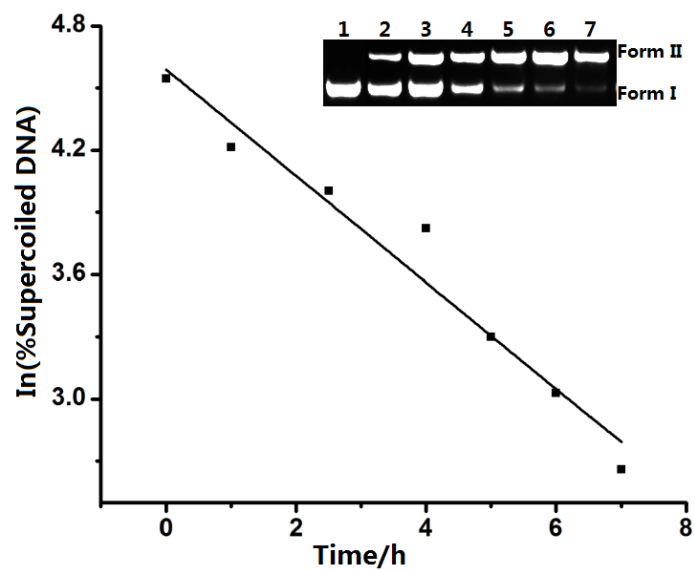

**Fig. S28.** Time course of pBR322 DNA cleavage promoted by complex 5 (25  $\mu$ M) at 37°C and pH 7.00. Inset: agarose GE patterns of the time-variable reaction products. Lanes 1-7, reaction time were 0, 1, 2.5, 4, 5, 6 and 7 h, respectively.

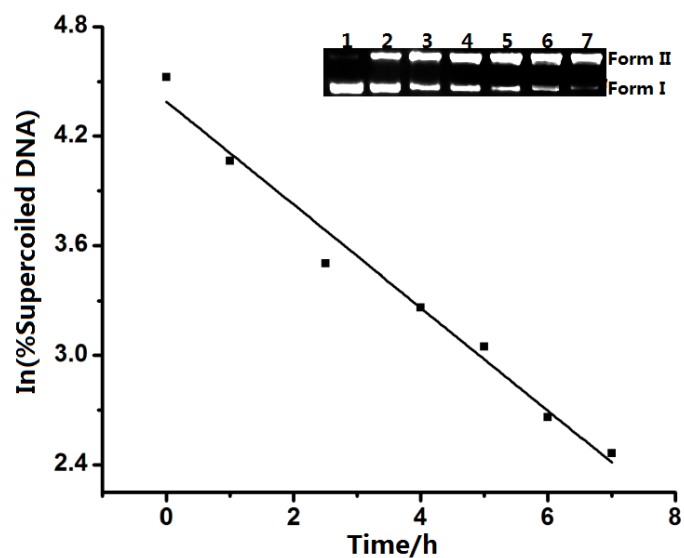

**Fig. S29.** Time course of pBR322 DNA cleavage promoted by complex 5 (37.5  $\mu$ M) at 37°C and pH 7.00. Inset: agarose GE patterns of the time-variable reaction products. Lanes 1-7, reaction time were 0, 1, 2.5, 4, 5, 6 and 7 h, respectively.

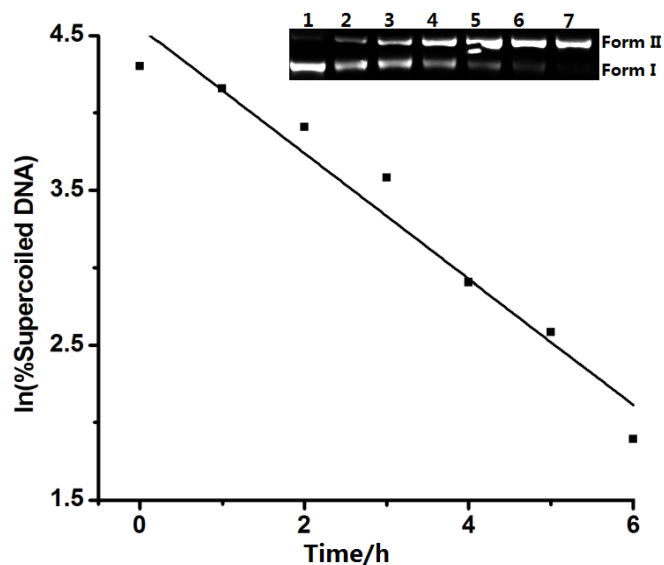

**Fig. S30.** Time course of pBR322 DNA cleavage promoted by complex **5** (50  $\mu$ M) at 37°C and pH 7.00. Inset: agarose GE patterns of the time-variable reaction products. Lanes 1-7, reaction time were 0, 1, 2, 3, 4, 5 and 6 h, respectively.

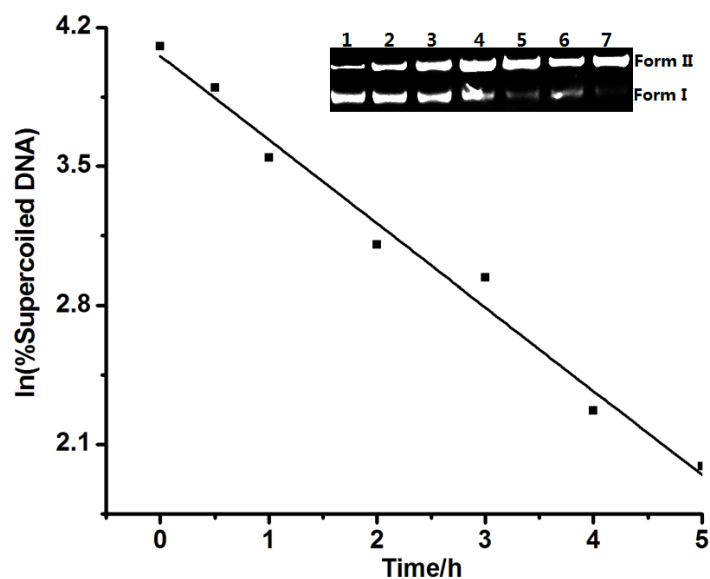

**Fig. S31.** Time course of pBR322 DNA cleavage promoted by complex **5** (62.5  $\mu$ M) at 37°C and pH 7.00. Inset: agarose GE patterns of the time-variable reaction products. Lanes 1-7, reaction time were 0, 0.5, 1, 2, 3, 4 and 5 h, respectively.

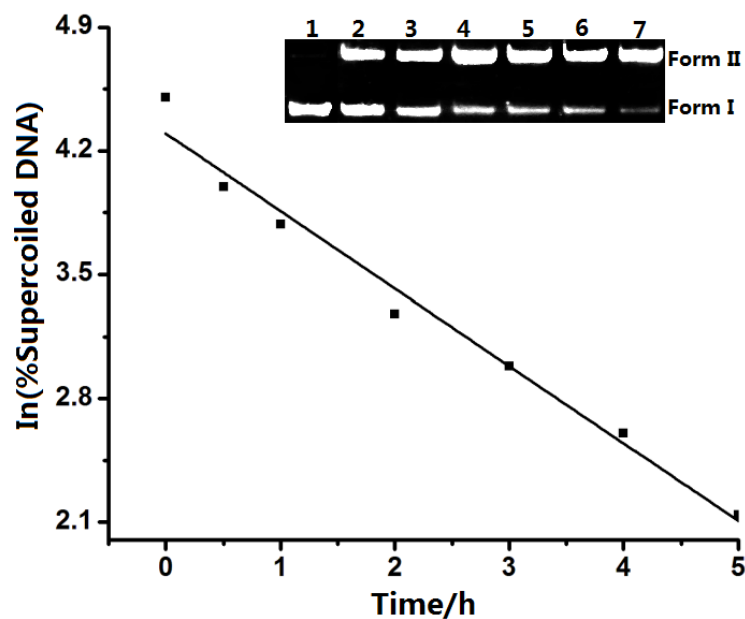

**Fig. S32.** Time course of pBR322 DNA cleavage promoted by complex 5 (75  $\mu$ M) at 37°C and pH 7.00. Inset: agarose GE patterns of the time-variable reaction products. Lanes 1-7, reaction time were 0, 0.5, 1, 2, 3, 4 and 5 h, respectively.

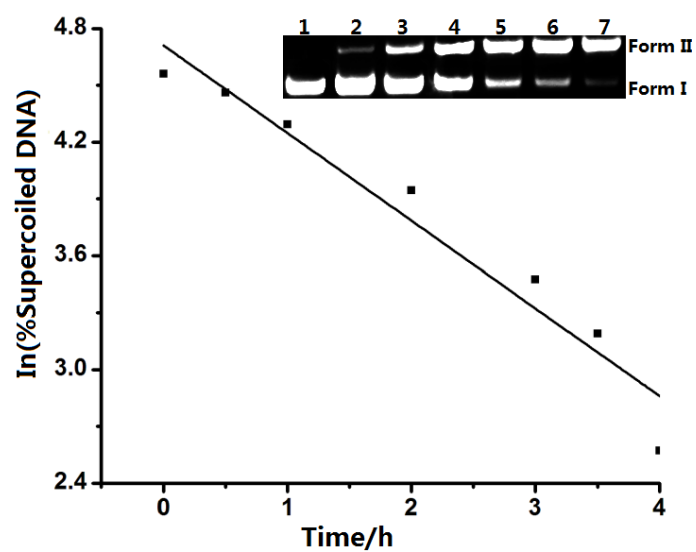

**Fig. S33.** Time course of pBR322 DNA cleavage promoted by complex 5 (87.5  $\mu$ M) at 37°C and pH 7.00. Inset: agarose GE patterns of the time-variable reaction products. Lanes 1-7, reaction time were 0, 0.5, 1, 2, 2.5, 3 and 4 h, respectively.

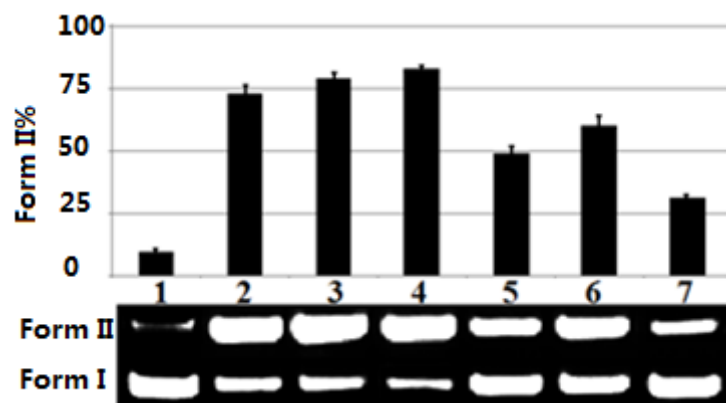

**Fig. S34.** Agarose GE patterns for the cleavage of pBR322 DNA by complex **2** (1.75 mM) at pH 7.0 and 37°C for 5 h, in the presence of DMSO (1 M, Lane 3), MeOH (1 M, Lane4), KI (0.1 M, Lane 5), NaN<sub>3</sub> (0.1 M, Lane 6) and EDTA (0.1 M, Lane 7). Lane 1, DNA alone and Lane 2: DNA + complex **2**.

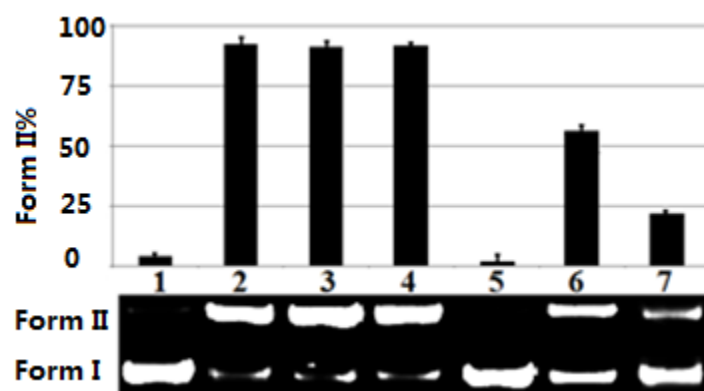

**Fig. S35.** Agarose GE patterns for the cleavage of pBR322 DNA by complex **3** (62.5 μM) at pH 7.0 and 37°C for 5 h, in the presence of DMSO (1 M, Lane 3), MeOH (1 M, Lane4), KI (0.1 M, Lane 5), NaN<sub>3</sub> (0.1 M, Lane 6) and EDTA (0.1 M, Lane 7). Lane 1, DNA alone and Lane 2: DNA + complex **3**.
